# Supplementary material for: A systemic cell stress signal confers neuronal resilience toward oxidative stress in a Hedgehog-dependent manner
Source: PubMed Central journal article supplement — Cell Rep. Author manuscript; Available in PMC 2022 Nov 1. (PMC9623505; doi:10.1016/j.celrep.2022.111488), 2022-10-18
Supplement: NIHMS1843691-supplement-1.pdf [file NIHMS1843691-supplement-1.pdf]

**Cell Reports, Volume 41**

**Supplemental information**

**A systemic cell stress signal confers  
neuronal resilience toward oxidative  
stress in a Hedgehog-dependent manner**

**Kyung Min Chung, Hyunha Kim, Cláudio Gouveia Roque, Ethan P. McCurdy, Trang T.T. Nguyen, Markus D. Siegelin, Jee-Yeon Hwang, and Ulrich Hengst**

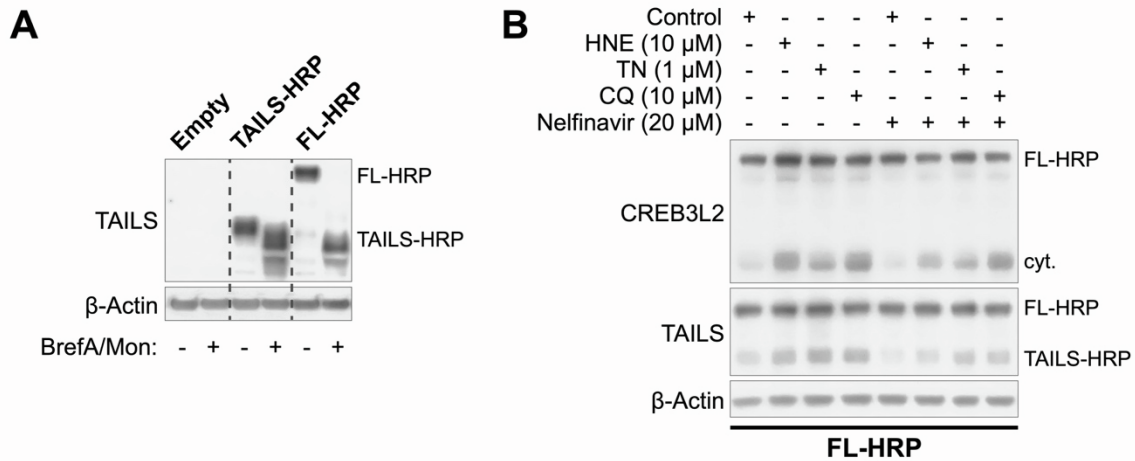

**Figure S1. TAILS is generated and extracellularly released through the secretory pathway in response to stress, related to Figure 2.**

(A) Western blot of TAILS in HEK293T cells expressing FL- or TAILS-HRP constructs. Secretory pathways were inhibited by treatment with brefeldin A and monensin to display accumulation of TAILS-HRP subjected to the secretory pathway.

(B) Western blot of TAILS in HEK293T cells expressing FL- or TAILS-HRP constructs treated with oxidative (HNE; 10  $\mu$ M), ER (TN; 2  $\mu$ M), and lysosomal (CQ, chloroquine; 10  $\mu$ M) stress inducers.

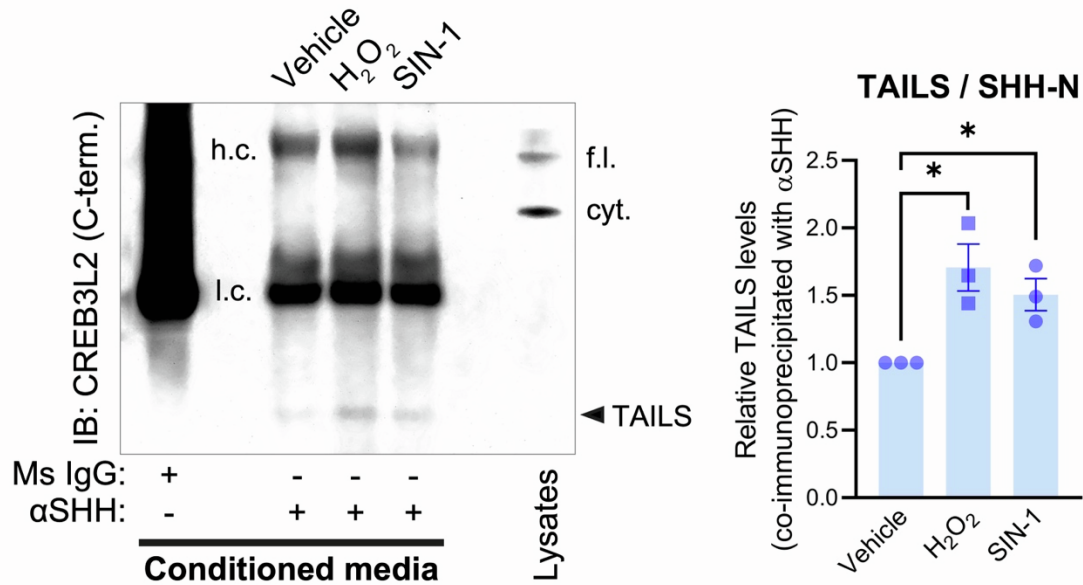

**Figure S2. TAILS proteins bind SHH and are induced by oxidative stress in neurons, related to Figure 3.**

Extracellular SHH proteins from co-cultures of primary cortical and hippocampal neurons were immunoprecipitated from condition media and the SHH-bound TAILS were detected with a CREB3L2 antibody specific for the C-terminus. Oxidative stress was induced by 6-h treatment of hydrogen peroxidase (200 μM) or SIN-1 (200 μM) in neurons. Neuronal lysate was prepared from the vehicle-treated condition in parallel as control. h.c., heavy chain; l.c., light chain; f.l., full-length; cyt., cytosolic. Means ± SEM (n=3 biological replicates). One-Way ANOVA, Tukey's multiple comparisons test. \*,  $P < 0.05$ .

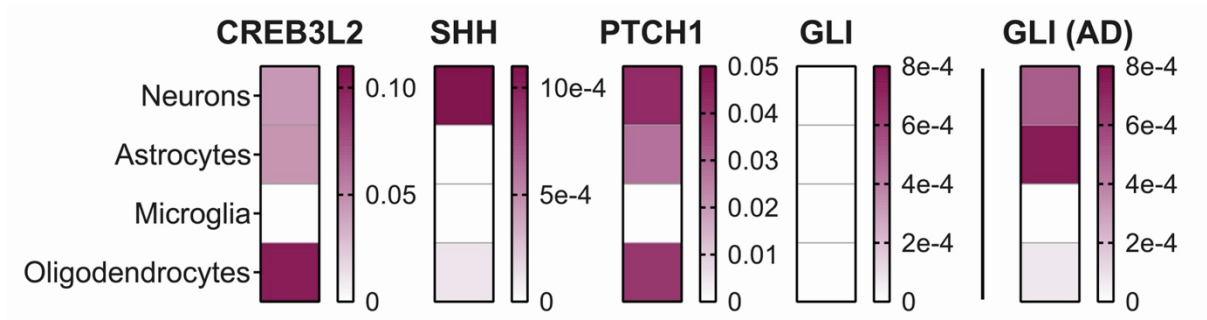

**Figure S3. Single-cell resolution transcriptomic profiles of CREB3L2 and hedgehog pathway genes in human hippocampus, related to Figure 3.**

Post-mortem non-demented and Alzheimer's disease (AD) brains were profiled at single-cell resolution (Yang et al., 2022). Average normalized counts of raw sequencing data (GSE163577) were acquired via [https://twc-stanford.shinyapps.io/human\\_bbb](https://twc-stanford.shinyapps.io/human_bbb).

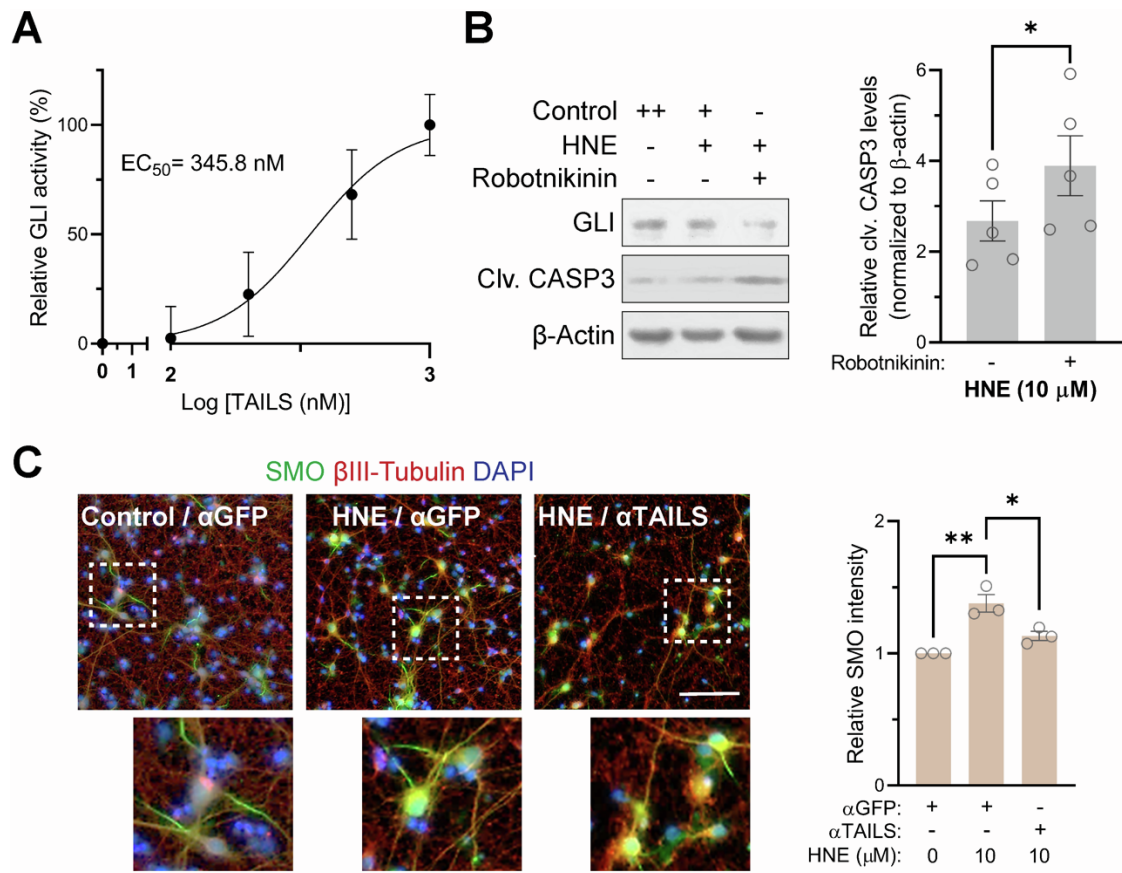

**Figure S4. TAILS facilitates SHH signaling and blockade of its signaling abolishes TAILS-induced resilience in neurons, related to Figure 3.**

(A) Dose-response curve of GLI activity in 7xGLI-GFP expressing Neuro2a cells treated with recombinant TAILS proteins. Non-linear modeling was used to determine EC<sub>50</sub> (345.8 nM) of GLI activity in cells under treatment with varying concentrations of recombinant TAILS. Mean ± SEM (n=8 replicates).

(B) Western blot analysis of cleaved CASP3 in HNE-stressed hippocampal neurons treated with or without a SHH inhibitor robotnikinin (20 μM). Quantification of cleaved CASP3. Mean ± SEM (n=5 biological replicates). Paired t-test, one-tailed. \*, *P*=0.0223.

(C) Immunofluorescence detection of SMO in hippocampal neurons treated with TAILS or GFP antibody (0.2 μg/mL). Quantification of SMO fluorescence intensity. Means ± SEM (n=3 biological replicates). One-way ANOVA, Tukey's multiple comparisons test. \*, *P*=0.0159; \*\*, *P*=0.002.

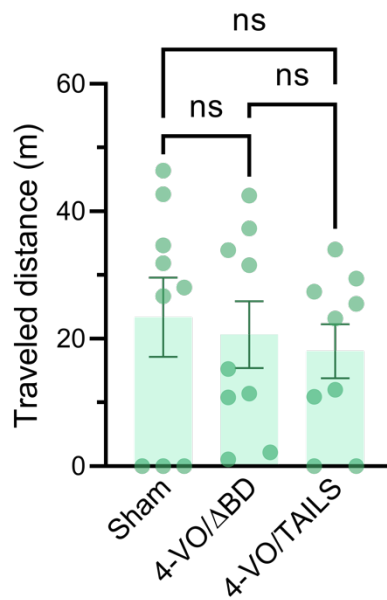

**Figure S5. 4-VO surgery or injection of recombinant protein did not affect animal locomotion during the novel object recognition task, related to Figure 6.**

Behavioral assessment of cognitive deficits in animals subjected for 4-VO or sham operation, administered with TAILS or  $\Delta$ BD ( $100 \text{ ng } \mu\text{l}^{-1}$ ;  $3 \mu\text{l}$  per hemisphere) through intrahippocampal injection in both hemispheres. Measurement of locomotion activity during the NOR task shows that animals subjected for 4-VO or sham operation have no locomotion deficits. One-way ANOVA, Tukey's multiple comparisons test.

| Classification      | Neuropathological Diagnosis                                        | Sample | Age | Gender | Cold PMI <sup>a</sup> | Frozen PMI <sup>b</sup> | NIA-Reagan Consensus | Braak NFT | CERAD Plaque <sup>c</sup> |
|---------------------|--------------------------------------------------------------------|--------|-----|--------|-----------------------|-------------------------|----------------------|-----------|---------------------------|
| Non-AD              | Encephalopathy of hypoxic-ischemic type, acute                     | 148    | 66  | Male   | 10:25                 | 21:55                   | Not eligible         | I         | Not eligible              |
| Non-AD              | No diagnosis                                                       | 5382   | 62  | Male   |                       | 5:24                    | Not eligible         | I         | Not eligible              |
| Non-AD              | No diagnosis                                                       | 346    | 84  | Male   | 10:00                 | 14:10                   | Low                  | II        | A                         |
| Non-AD              | No diagnosis                                                       | 3799   | 89+ | Female | 2:55                  | 14:09                   | Not eligible         | III       | Not eligible              |
| Alzheimer's disease | Possible AD                                                        | 4051   | 89+ | Male   | 3:10                  | 16:55                   | Intermediate         | V         | B                         |
| Alzheimer's disease | Possible AD                                                        | 4857   | 89+ | Male   |                       | 12:40                   | Intermediate         | III       | B                         |
| Alzheimer's disease | Possible AD                                                        | 4871   | 86  | Female | 1:50                  | 23:45                   | Intermediate         | V         | B                         |
| Alzheimer's disease | Probable AD                                                        | 4389   | 86  | Male   |                       |                         | Intermediate         | V         | C                         |
| Alzheimer's disease | Encephalopathy, degenerative, moderate consistent with probable AD | 4897   | 89+ | Female | 0:15                  | 18:35                   | Intermediate         | V         | C                         |
| Alzheimer's disease | AD neuropathologic changes                                         | 5226   | 89+ | Female | 2:40                  | 10:50                   | Intermediate         | VI        | C                         |
| Alzheimer's disease | Dementia                                                           | 4856   | 89+ | Female | 0:45                  | 16:30                   | High                 | V         | C                         |

**Table S1. Neuropathological evaluation of post-mortem human specimens of dorsolateral prefrontal cortex tissues derived from Brodmann area (BA) 9/10, related to Figure 2D.**

<sup>a</sup> Cold PMI: Post-mortem interval calculated from the reported time of death to the time the patient was brought into the cold room.

<sup>b</sup> Frozen PMI: Post-mortem interval calculated from the reported time of death to the time the brain was processed.

<sup>c</sup> Neuropathological classification follows ABC criteria.

\* Cases are listed in the same order as in Figure 2D.
